# Supplementary material
Source: ML conference proceedings conference paper supplement (https://proceedings.mlr.press/v119/li20s.html)
Supplement: Supplementary file [file li20s-supp.pdf]

---

## Supplement to “On a Projective Ensemble Approach to Two Sample Test for Equality of Distributions”

---

Zhimei Li<sup>1</sup> Yaowu Zhang<sup>1</sup>

### S.1. Proof of Theorem 1

The assertion that  $T$  is nonnegative is straightforward because  $\{F_\beta(t) - G_\beta(t)\}^2$  and the weight function are both nonnegative when  $H(\beta, t)$  is the cumulative distribution function of a  $p + 1$  dimensional multivariate joint normal random vector with mean  $\mathbf{0}$  and covariance  $\mathbf{I}_{p+1}$ . In addition,  $T$  equals zero if and only if  $F = G$  because the weight function is positive for almost all  $\beta$  and  $t$ .

We now show that  $T = T_1 - 2T_2 + T_3$ . For simplicity, we only show that

$$\begin{aligned} & \iint F_\beta^2(t) dH(\beta, t) \\ &= \frac{1}{4} + \frac{1}{2\pi} E \arcsin \left( \frac{1 + \mathbf{x}_1^T \mathbf{x}_2}{\sqrt{1 + \mathbf{x}_1^T \mathbf{x}_1} \sqrt{1 + \mathbf{x}_2^T \mathbf{x}_2}} \right). \end{aligned}$$

By applying the Fubini's theorem, and treating  $\mathbf{x}_1$  and  $\mathbf{x}_2$  as constants,  $(\beta, t)^T$  as a  $p + 1$  dimensional multivariate joint normal random vector with cumulative distribution function  $H(\beta, t)$ ,

$$\begin{aligned} & \iint F_\beta^2(t) dH(\beta, t) \\ &= E \iint I(\beta^T \mathbf{x}_1 \leq t, \beta^T \mathbf{x}_2 \leq t) dH(\beta, t) \\ &= E \{ \mathbf{P}(t - \beta^T \mathbf{x}_1 \geq 0, t - \beta^T \mathbf{x}_2 \geq 0 \mid \mathbf{x}_1, \mathbf{x}_2) \}. \end{aligned}$$

For each  $\mathbf{x}_1$  and  $\mathbf{x}_2$ ,  $t - \beta^T \mathbf{x}_1$  and  $t - \beta^T \mathbf{x}_2$  are joint normal with mean vector zero and correlation  $\frac{1 + \mathbf{x}_1^T \mathbf{x}_2}{\sqrt{1 + \mathbf{x}_1^T \mathbf{x}_1} \sqrt{1 + \mathbf{x}_2^T \mathbf{x}_2}}$ . Therefore, by applying Lemma 1, we have

$$\begin{aligned} & \{ \mathbf{P}(t - \beta^T \mathbf{x}_1 \geq 0, t - \beta^T \mathbf{x}_2 \geq 0 \mid \mathbf{x}_1, \mathbf{x}_2) \} \\ &= \frac{1}{4} + \frac{1}{2\pi} \arcsin \left( \frac{1 + \mathbf{x}_1^T \mathbf{x}_2}{\sqrt{1 + \mathbf{x}_1^T \mathbf{x}_1} \sqrt{1 + \mathbf{x}_2^T \mathbf{x}_2}} \right). \end{aligned}$$

---

<sup>1</sup>Research Institute for Interdisciplinary Sciences, School of Information Management and Engineering, Shanghai University of Finance and Economics, Shanghai, China. Correspondence to: Yaowu Zhang <zhang.yaowu@mail.shufe.edu.cn>.

With similar arguments for dealing with  $\iint G_\beta^2(t) dH(\beta, t)$  and  $\iint F_\beta(t) G_\beta(t) dH(\beta, t)$ , the proof is completed. □

### S.2. Proof of Theorem 2

Define the empirical processes

$$\zeta_{m,n}(\beta, t) = \sqrt{mn/(m+n)} \{U_m(\beta, t) - V_n(\beta, t)\}$$

where

$$\begin{aligned} U_m(\beta, t) &= m^{-1} \sum_{i=1}^m I(\beta^T \mathbf{x}_i \leq t), \\ V_n(\beta, t) &= n^{-1} \sum_{i=1}^n I(\beta^T \mathbf{y}_i \leq t). \end{aligned}$$

Then it can be verified that

$$\begin{aligned} \frac{mn}{m+n} \hat{T} &= \frac{2\pi mn}{m+n} \iint \{ \hat{F}_\beta(t) - \hat{G}_\beta(t) \}^2 dH(\beta, t) \\ &= 2\pi \iint \{ \zeta_{m,n}(\beta, t) \}^2 dH(\beta, t). \end{aligned}$$

Under the null hypothesis,  $\mathbf{x}$  and  $\mathbf{y}$  are equally distributed, then we have

$$\begin{aligned} & E \{ \zeta_{m,n}(\beta, t) \} \\ &= \sqrt{mn/(m+n)} E \{ U_m(\beta, t) - V_n(\beta, t) \} \\ &= 0. \end{aligned}$$

In addition,

$$\begin{aligned} & \text{cov} \{ U_m(\beta, t) - V_n(\beta, t), U_m(\alpha, t) - V_n(\alpha, s) \} \\ &= \text{cov} \left[ \frac{1}{m} \sum_{i=1}^m \{ I(\beta^T \mathbf{x}_i \leq t) \} - \frac{1}{n} \sum_{i=1}^n \{ I(\beta^T \mathbf{y}_i \leq t) \}, \right. \\ & \quad \left. \frac{1}{m} \sum_{i=1}^m \{ I(\alpha^T \mathbf{x}_i \leq s) \} - \frac{1}{n} \sum_{i=1}^n \{ I(\alpha^T \mathbf{y}_i \leq s) \} \right] \\ &= \frac{1}{m^2} \text{cov} \left\{ \sum_{i=1}^m I(\beta^T \mathbf{x}_i \leq t), \sum_{i=1}^m I(\alpha^T \mathbf{x}_i \leq s) \right\} \\ & \quad + \frac{1}{n^2} \text{cov} \left\{ \sum_{i=1}^n I(\beta^T \mathbf{y}_i \leq t), \sum_{i=1}^n I(\alpha^T \mathbf{y}_i \leq s) \right\} \end{aligned}$$

$$\begin{aligned}
 &= \frac{1}{m} \text{cov} \{I(\beta^T \mathbf{x} \leq t), I(\alpha^T \mathbf{x} \leq s)\} \\
 &\quad + \frac{1}{n} \text{cov} \{I(\beta^T \mathbf{y} \leq t), I(\alpha^T \mathbf{y} \leq s)\} \\
 &= \frac{m+n}{mn} \{P(\beta^T \mathbf{x} \leq t, \alpha^T \mathbf{x} \leq s) \\
 &\quad - P(\beta^T \mathbf{x} \leq t)P(\alpha^T \mathbf{x} \leq s)\}.
 \end{aligned}$$

Therefore, the covariance function of  $\zeta_{m,n}(\beta, t)$  can be written as

$$\begin{aligned}
 &\text{cov} \{\zeta_{m,n}(\beta, t), \zeta_{m,n}(\alpha, s)\} \\
 &= \frac{mn}{m+n} \text{cov} \{U_m(\beta, t) - V_n(\beta, t), \\
 &\quad U_m(\alpha, s) - V_n(\alpha, s)\} \\
 &= P(\beta^T \mathbf{x} \leq t, \alpha^T \mathbf{x} \leq s) - P(\beta^T \mathbf{x} \leq t)P(\alpha^T \mathbf{x} \leq s).
 \end{aligned}$$

Consequently, by noting that  $I(\beta^T \mathbf{x} \leq s)$  belongs to the VC class, and according to (Van Der Vaart & Wellner, 1996), it follows that the empirical processes  $\zeta_{m,n}(\beta, t)$  converges in distribution to a Gaussian process  $\zeta(\beta, t)$ , where the mean function is zero and the covariance function  $\text{cov} \{\zeta(\beta, t), \zeta(\alpha, s)\}$  is given by

$$P(\beta^T \mathbf{x} \leq t, \alpha^T \mathbf{x} \leq s) - P(\beta^T \mathbf{x} \leq t)P(\alpha^T \mathbf{x} \leq s).$$

Then we have

$$\begin{aligned}
 \frac{mn}{m+n} \widehat{T} &= 2\pi \iint \{\zeta_{m,n}(\beta, t)\}^2 dH(\beta, t) \\
 &\xrightarrow{d} 2\pi \iint \{\zeta(\beta, t)\}^2 dH(\beta, t),
 \end{aligned}$$

which completes the proof.  $\square$

### S.3. Proof of Theorem 3

Under the global alternative, there exists some  $\beta$  and  $t$ , such that  $P(\beta^T \mathbf{x} \leq t) \neq P(\beta^T \mathbf{y} \leq t)$ . Therefore, we have

$$\begin{aligned}
 &\{U_m(\beta, t) - V_n(\beta, t)\}^2 - \{P(\beta^T \mathbf{x} \leq t) - P(\beta^T \mathbf{y} \leq t)\}^2 \\
 &= 2 \{P(\beta^T \mathbf{x} \leq t) - P(\beta^T \mathbf{y} \leq t)\} \{U_m(\beta, t) - P(\beta^T \mathbf{x} \leq t) \\
 &\quad - V_n(\beta, t) + P(\beta^T \mathbf{y} \leq t)\} + o_p(m^{-1/2} + n^{-1/2}).
 \end{aligned}$$

With Fubini's theorem, it is easy to show that

$$\begin{aligned}
 &\iint \{P(\beta^T \mathbf{x} \leq t) - P(\beta^T \mathbf{y} \leq t)\} I(\beta^T \mathbf{x}_i \leq t) dH(\beta, t) \\
 &= \frac{1}{4} + \frac{1}{2\pi} Z_{1i},
 \end{aligned}$$

where  $Z_{1i}$  is the independent copy of  $Z_1$  defined as

$$\begin{aligned}
 &E \left\{ \arcsin \left( \frac{1 + \widetilde{\mathbf{x}}^T \mathbf{x}}{\sqrt{1 + \widetilde{\mathbf{x}}^T \widetilde{\mathbf{x}} \sqrt{1 + \mathbf{x}^T \mathbf{x}}} \right) \right. \\
 &\quad \left. - \arcsin \left( \frac{1 + \mathbf{x}^T \widetilde{\mathbf{y}}}{\sqrt{1 + \mathbf{x}^T \mathbf{x} \sqrt{1 + \widetilde{\mathbf{y}}^T \widetilde{\mathbf{y}}} \right) \right\} \Big| \mathbf{x} \Big\} \quad (\text{S.3.1})
 \end{aligned}$$

and  $(\widetilde{\mathbf{x}}, \widetilde{\mathbf{y}})$  is the independent copy of  $(\mathbf{x}, \mathbf{y})$ . Similarly, we have

$$\begin{aligned}
 &\iint \{P(\beta^T \mathbf{x} \leq t) - P(\beta^T \mathbf{y} \leq t)\} I(\beta^T \mathbf{y}_i \leq t) dH(\beta, t) \\
 &= \frac{1}{4} + \frac{1}{2\pi} Z_{2i},
 \end{aligned}$$

where  $Z_{2i}$  is the independent copy of  $Z_2$  given by

$$\begin{aligned}
 &E \left\{ \arcsin \left( \frac{1 + \widetilde{\mathbf{x}}^T \mathbf{y}}{\sqrt{1 + \widetilde{\mathbf{x}}^T \widetilde{\mathbf{x}} \sqrt{1 + \mathbf{y}^T \mathbf{y}}} \right) \right. \\
 &\quad \left. - \arcsin \left( \frac{1 + \widetilde{\mathbf{y}}^T \mathbf{y}}{\sqrt{1 + \widetilde{\mathbf{y}}^T \widetilde{\mathbf{y}} \sqrt{1 + \mathbf{y}^T \mathbf{y}}} \right) \right\} \Big| \mathbf{y} \Big\} \quad (\text{S.3.2})
 \end{aligned}$$

Combining the above results, we have

$$\begin{aligned}
 &\widehat{T} - T \\
 &= 2\pi \iint \left[ \{U_m(\beta, t) - V_n(\beta, t)\}^2 \right. \\
 &\quad \left. - \{P(\beta^T \mathbf{x} \leq t) - P(\beta^T \mathbf{y} \leq t)\}^2 \right] dH(\beta, t) \\
 &= 2 \left\{ m^{-1} \sum_{i=1}^m Z_{1i} - E(Z_{1i}) - n^{-1} \sum_{i=1}^n Z_{2i} + E(Z_{2i}) \right\} \\
 &\quad + o_p(m^{-1/2} + n^{-1/2}),
 \end{aligned}$$

which entails the desired result according to the central limit theorem and Slutsky theorem.  $\square$

### S.4. Proof of Theorem 4

Under the local alternative, we have

$$P(\beta^T \mathbf{x} \leq t) = P(\beta^T \mathbf{y} \leq t) + (m+n)^{-1/2} \ell(\beta, t).$$

Then it can be shown that

$$\begin{aligned}
 &E \{\zeta_{m,n}(\beta, t)\} \\
 &= \sqrt{mn/(m+n)} E \{U_m(\beta, t) - V_n(\beta, t)\} \\
 &= \sqrt{mn}/(m+n) \ell(\beta, t),
 \end{aligned}$$

which converges in probability to  $\sqrt{\tau(1-\tau)} \ell(\beta, t)$  as  $\min(m, n) \rightarrow \infty$ . In addition, similar to the proof of Theorem 2, the covariance function of  $\zeta_{m,n}(\beta, t)$  can be calculated as

$$\begin{aligned}
 &\text{cov} \{\zeta_{m,n}(\beta, t), \zeta_{m,n}(\alpha, s)\} \\
 &= P(\beta^T \mathbf{x} \leq t, \alpha^T \mathbf{x} \leq s) - P(\beta^T \mathbf{x} \leq t)P(\alpha^T \mathbf{x} \leq s).
 \end{aligned}$$

Therefore, it follows that the empirical processes  $\zeta_{m,n}(\beta, t)$  converges in distribution to a Gaussian process with mean function  $\sqrt{\tau(1-\tau)} \ell(\beta, t)$ , and the covariance function given by (4). That is, under the local alternative,  $\zeta_{m,n}(\beta, t)$

converges in distribution to  $\zeta(\boldsymbol{\beta}, t) + \sqrt{\tau(1-\tau)}\ell(\boldsymbol{\beta}, t)$ . Hence we have

$$\begin{aligned} & \frac{mn}{m+n} \widehat{T} \\ &= 2\pi \iint \{\zeta_{m,n}(\boldsymbol{\beta}, t)\}^2 dH(\boldsymbol{\beta}, t) \\ &\xrightarrow{d} 2\pi \iint \{\zeta(\boldsymbol{\beta}, t) + \sqrt{\tau(1-\tau)}\ell(\boldsymbol{\beta}, t)\}^2 dH(\boldsymbol{\beta}, t), \end{aligned}$$

which completes the proof.  $\square$

### S.5. Proof of Theorem 5

Since  $\{\mathbf{z}_1^*, \mathbf{z}_2^*, \dots, \mathbf{z}_{m+n}^*\}$  is a random permutation of  $\{\mathbf{x}_1, \dots, \mathbf{x}_n, \mathbf{y}_1, \dots, \mathbf{y}_n\}$ , conditional on the original sample,  $\mathbf{x}_1^*, \dots, \mathbf{x}_m^*, \mathbf{y}_1^*, \dots, \mathbf{y}_n^*$  are asymptotically independently and identically distributed. The pooled distribution function is given by  $m/(m+n)F_m + m/(m+n)G_n$ . We define the empirical processes

$$\zeta_{m,n}^*(\boldsymbol{\beta}, t) = \sqrt{mn/(m+n)}\{U_m^*(\boldsymbol{\beta}, t) - V_n^*(\boldsymbol{\beta}, t)\}$$

where

$$\begin{aligned} U_m^*(\boldsymbol{\beta}, t) &= m^{-1} \sum_{i=1}^m I(\boldsymbol{\beta}^T \mathbf{x}_i^* \leq t), \\ V_n^*(\boldsymbol{\beta}, t) &= n^{-1} \sum_{i=1}^n I(\boldsymbol{\beta}^T \mathbf{y}_i^* \leq t). \end{aligned}$$

Therefore, according to the proof of Theorem 2, conditional on the original sample, the expectation of the empirical processes  $\zeta_{m,n}^*(\boldsymbol{\beta}, t)$  is zero and the covariance function is given by

$$\begin{aligned} & \text{cov} \{ \zeta_{m,n}^*(\boldsymbol{\beta}, t), \zeta_{m,n}^*(\boldsymbol{\alpha}, s) \mid \mathbf{x}_1, \dots, \mathbf{x}_m, \mathbf{y}_1, \dots, \mathbf{y}_n \} \\ &= P_{m+n}(\boldsymbol{\beta}^T \mathbf{z} \leq t, \boldsymbol{\alpha}^T \mathbf{z} \leq s) - \\ & P_{m+n}(\boldsymbol{\beta}^T \mathbf{z} \leq t) P_{m+n}(\boldsymbol{\alpha}^T \mathbf{z} \leq s), \end{aligned}$$

where  $P_{m+n}$  is the pooled empirical probability, i.e.,

$$\begin{aligned} & P_{m+n}(\boldsymbol{\beta}^T \mathbf{z} \leq t, \boldsymbol{\alpha}^T \mathbf{z} \leq s) \\ &= \frac{1}{m+n} \left\{ \sum_{i=1}^m I(\boldsymbol{\beta}^T \mathbf{x}_i \leq t, \boldsymbol{\alpha}^T \mathbf{x}_i \leq s) \right. \\ & \quad \left. + \sum_{i=1}^n I(\boldsymbol{\beta}^T \mathbf{y}_i \leq t, \boldsymbol{\alpha}^T \mathbf{y}_i \leq s) \right\}. \end{aligned}$$

With the slusky theorem, the empirical probability  $P_{m+n}(\boldsymbol{\beta}^T \mathbf{z} \leq t, \boldsymbol{\alpha}^T \mathbf{z} \leq s)$  converges in probability to  $\tau P(\boldsymbol{\beta}^T \mathbf{x} \leq t, \boldsymbol{\alpha}^T \mathbf{x} \leq s) + (1-\tau)P(\boldsymbol{\beta}^T \mathbf{y} \leq t, \boldsymbol{\alpha}^T \mathbf{y} \leq s)$ .

Subsequently, we have

$$\begin{aligned} & \text{cov} \{ \zeta_{m,n}^*(\boldsymbol{\beta}, t), \zeta_{m,n}^*(\boldsymbol{\alpha}, s) \mid \mathbf{x}_1, \dots, \mathbf{x}_m, \mathbf{y}_1, \dots, \mathbf{y}_n \} \\ &= \tau P(\boldsymbol{\beta}^T \mathbf{x} \leq t, \boldsymbol{\alpha}^T \mathbf{x} \leq s) + (1-\tau)P(\boldsymbol{\beta}^T \mathbf{y} \leq t, \boldsymbol{\alpha}^T \mathbf{y} \leq s) \\ & \quad - \{ \tau P(\boldsymbol{\beta}^T \mathbf{x} \leq t) + (1-\tau)P(\boldsymbol{\beta}^T \mathbf{y} \leq t) \} \\ & \quad \{ \tau P(\boldsymbol{\alpha}^T \mathbf{x} \leq s) + (1-\tau)P(\boldsymbol{\alpha}^T \mathbf{y} \leq s) \} + o_p(1). \end{aligned}$$

Therefore, by denoting  $\zeta^*(\boldsymbol{\beta}, t)$  the Gaussian process with mean function zero and the covariance function  $\text{cov} \{ \zeta^*(\boldsymbol{\beta}, t), \zeta^*(\boldsymbol{\alpha}, s) \}$  is given by

$$\begin{aligned} & \tau P(\boldsymbol{\beta}^T \mathbf{x} \leq t, \boldsymbol{\alpha}^T \mathbf{x} \leq s) + (1-\tau)P(\boldsymbol{\beta}^T \mathbf{y} \leq t, \boldsymbol{\alpha}^T \mathbf{y} \leq s) \\ & \quad - \{ \tau P(\boldsymbol{\beta}^T \mathbf{x} \leq t) + (1-\tau)P(\boldsymbol{\beta}^T \mathbf{y} \leq t) \} \{ \tau P(\boldsymbol{\alpha}^T \mathbf{x} \leq s) \\ & \quad \quad + (1-\tau)P(\boldsymbol{\alpha}^T \mathbf{y} \leq s) \}. \end{aligned}$$

we have conditional on the original sample, the empirical processes  $\zeta_{m,n}^*(\boldsymbol{\beta}, t)$  converges in distribution to a Gaussian process whose mean function is zero and covariance function is asymptotically the same as  $\zeta^*(\boldsymbol{\beta}, t)$ . According to (Zhu & Neuhaus, 2003), we have the conditional distribution of  $mn/(m+n)\widehat{T}^*$  and  $2\pi \iint \{\zeta^*(\boldsymbol{\beta}, t)\}^2 dH(\boldsymbol{\beta}, t)$  are asymptotically the same. This further yields the assertion of this theorem because the limiting distribution is continuous.  $\square$

### References

- Van Der Vaart, A. W. and Wellner, J. A. *Weak convergence and empirical processes*. Springer, 1996.
- Zhu, L.-X. and Neuhaus, G. Conditional tests for elliptical symmetry. *Journal of Multivariate Analysis*, 84(2):284–298, 2003.
